# Supplementary material
Source: MDPI journal article supplement (https://www.mdpi.com/2073-8994/13/8/1365)
Supplement: s1 [file s1]

*Supplementary materials*

# Racemic and meso crystal structures of an axial-chiral spirobi-(dinaphthoazepin)ium salt: Emergence of an $S_4$ -symmetric molecule

Philipp Honegger<sup>1,\*</sup>, Natalie Gajic<sup>2</sup>, Alexander Prado-Roller<sup>2</sup> and Michael Widhalm<sup>3</sup>

<sup>1</sup> Institute of Computational Biological Chemistry, University of Vienna, Währinger Straße 17, 1090 Vienna, Austria

<sup>2</sup> Institute of Inorganic Chemistry, University of Vienna, Währinger Straße 42, 1090 Vienna, Austria

<sup>3</sup> Institute of Chemical Catalysis, University of Vienna, Währinger Straße 38, 1090 Vienna, Austria

\* Correspondence: philipp.honegger@univie.ac.at

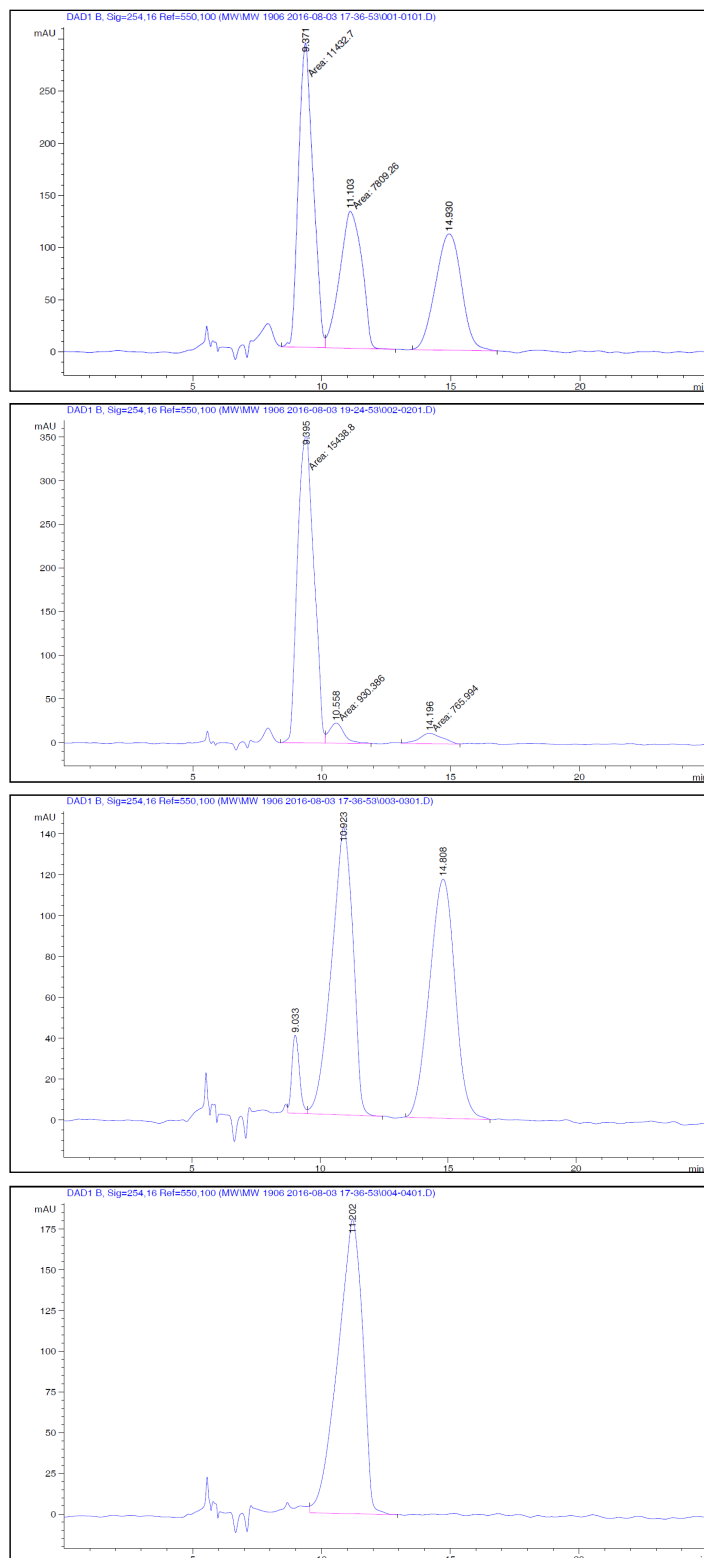

crude mixture

*(R)(S)-2 meso**(R)(R)/(S)(S)-2 racemate**(R)(R)-2 enantiomers***Figure S1:** HPLC Separation of Stereoisomers of **2\***

\* Chiralcel-ODH, MeOH (12.5%), EtOH (12.5%), Heptane (74.7%), TFA (0.3%), 0.5 mLmin<sup>-1</sup>, 38 °C;  
 samples: 0.3-0.4 mg dissolved in 0.3 mL DCM, 1 mL EtOH; 3-5 µL injected, integration at 254 nm.

§ authentic sample prepared from (*R*)-2,2'-bisbromomethyl-1,1'-binaphthyl.

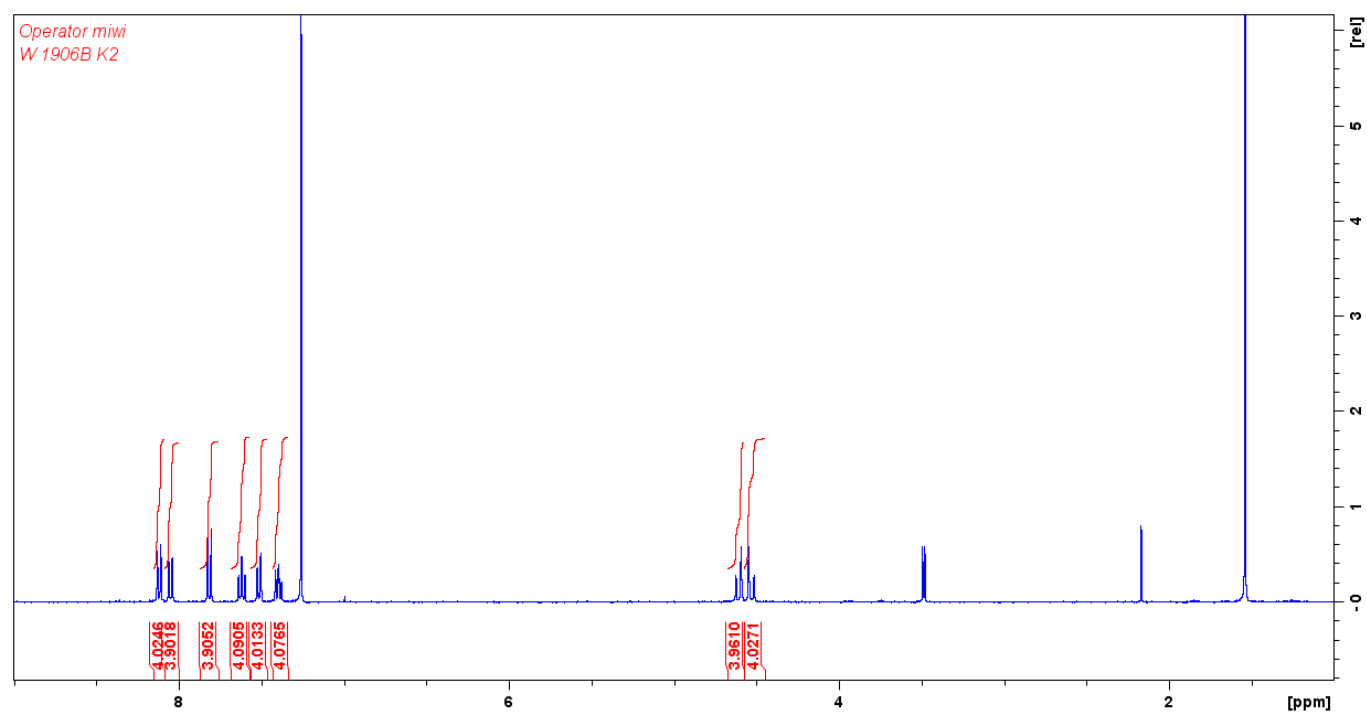

Figure S2: (*R,S*)<sub>ax</sub>-2 (<sup>1</sup>H NMR in CDCl<sub>3</sub>)

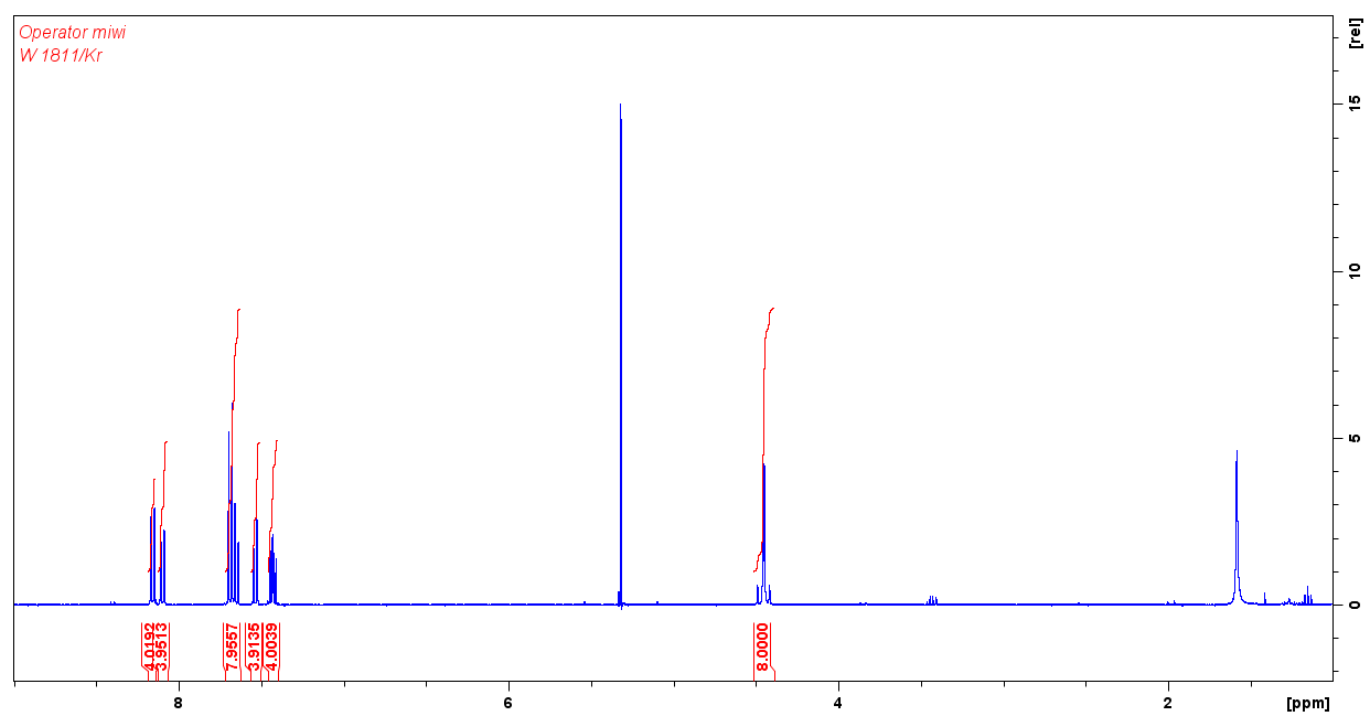

Figure S3: (*R,S*)<sub>ax</sub>-2 (<sup>1</sup>H NMR in CD<sub>2</sub>Cl<sub>2</sub>)

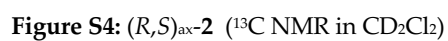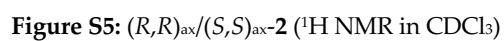

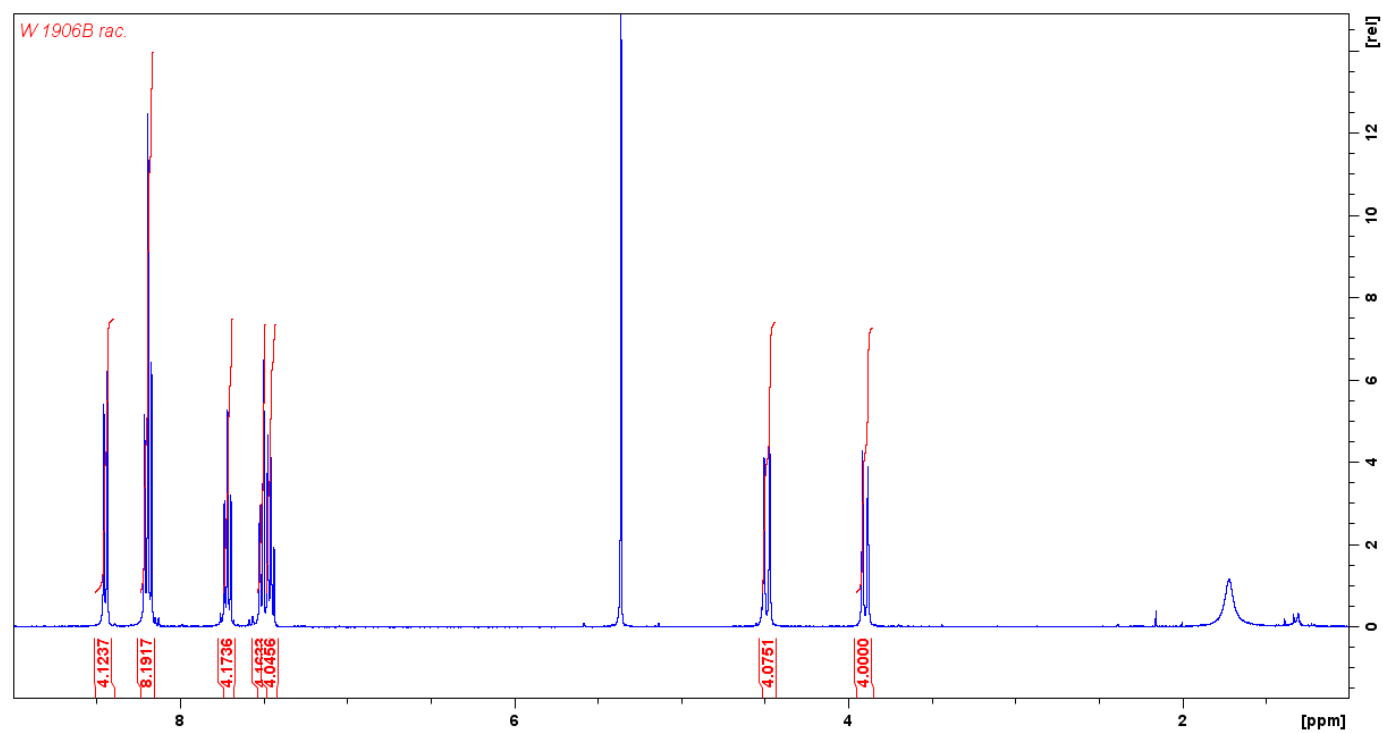

Figure S6: (R,R)<sub>ax</sub>/(S,S)<sub>ax</sub>-2 (<sup>1</sup>H NMR in CD<sub>2</sub>Cl<sub>2</sub>)

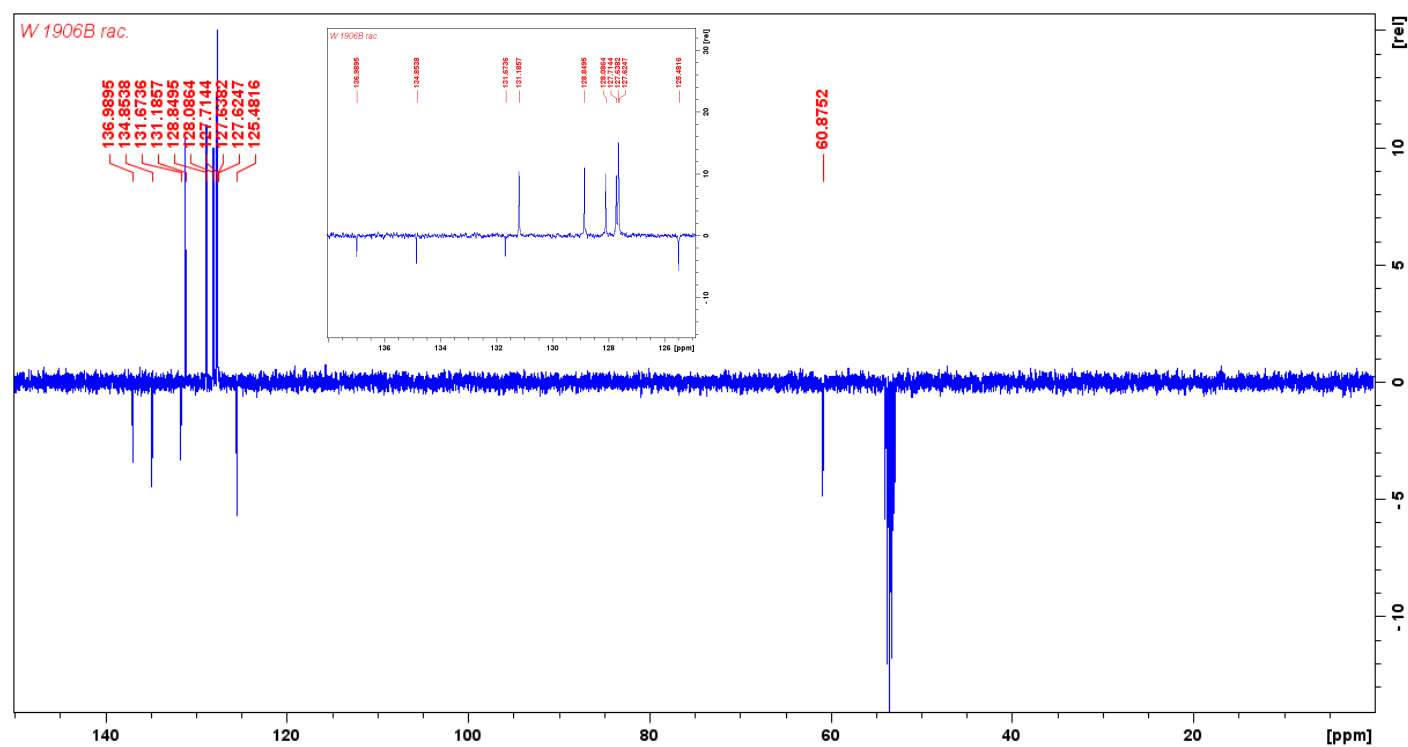

Figure S7: (R,R)<sub>ax</sub>/(S,S)<sub>ax</sub>-2 (<sup>13</sup>C NMR in CD<sub>2</sub>Cl<sub>2</sub>)

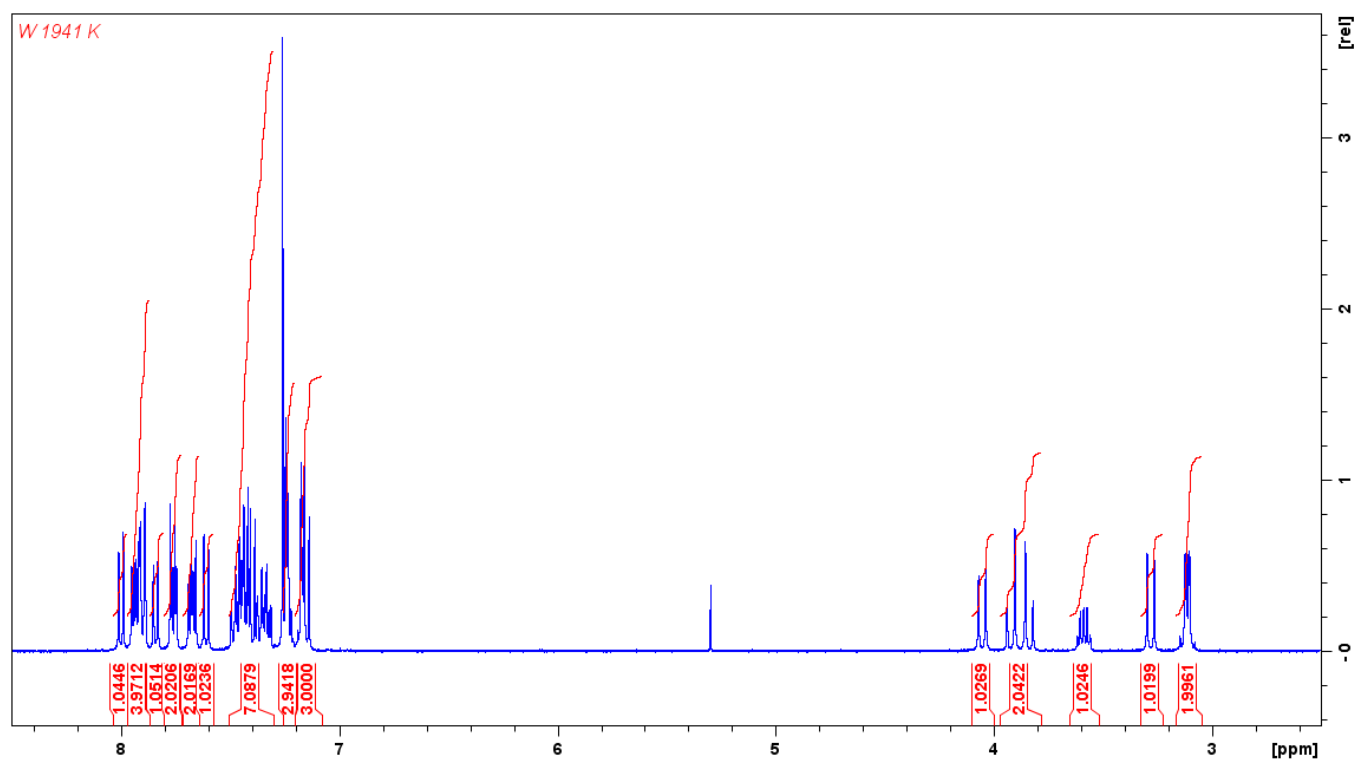Figure S8: (R,R)<sub>ax</sub>/(S,S)<sub>ax</sub>-4 (<sup>1</sup>H NMR in CDCl<sub>3</sub>)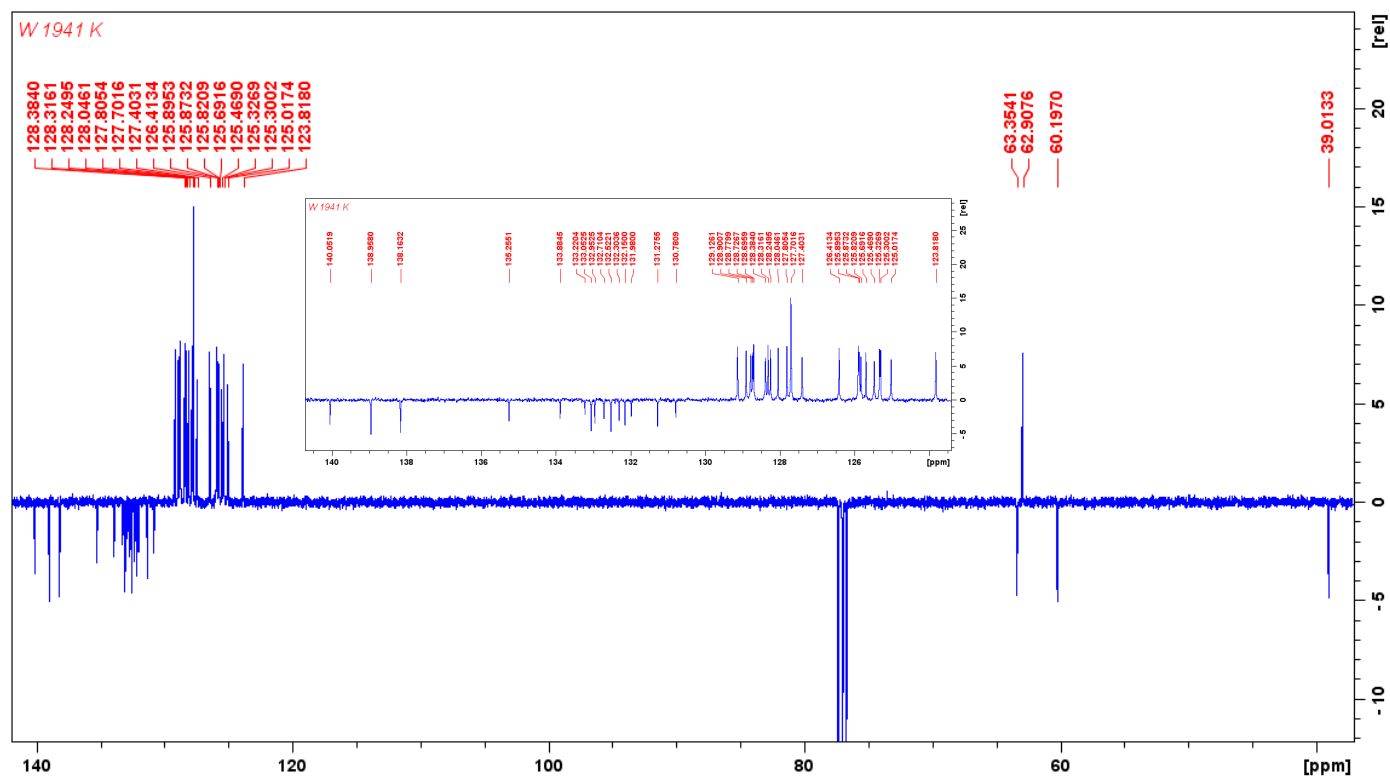Figure S9: (R,R)<sub>ax</sub>/(S,S)<sub>ax</sub>-4 (<sup>13</sup>C NMR in CDCl<sub>3</sub>)

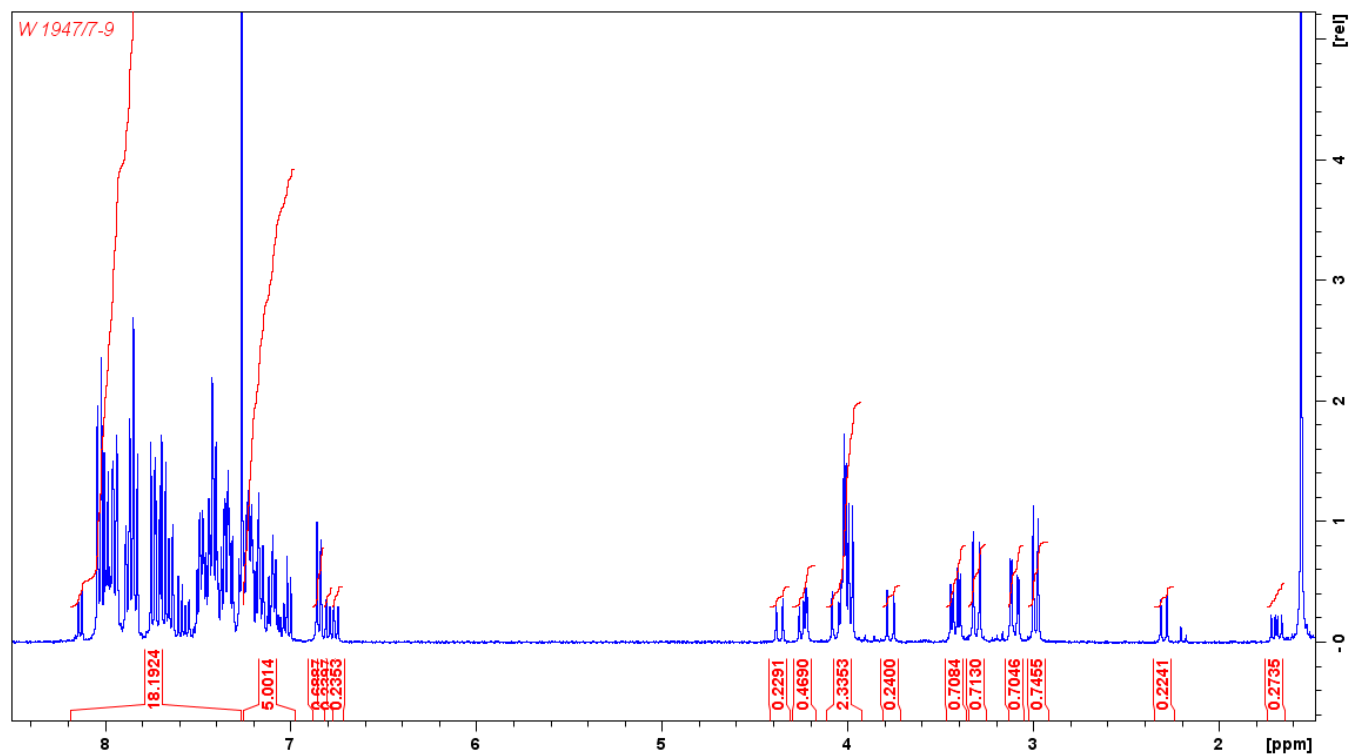Figure S10: mixture of 5 and 6 (70:30) (<sup>1</sup>H NMR in CDCl<sub>3</sub>)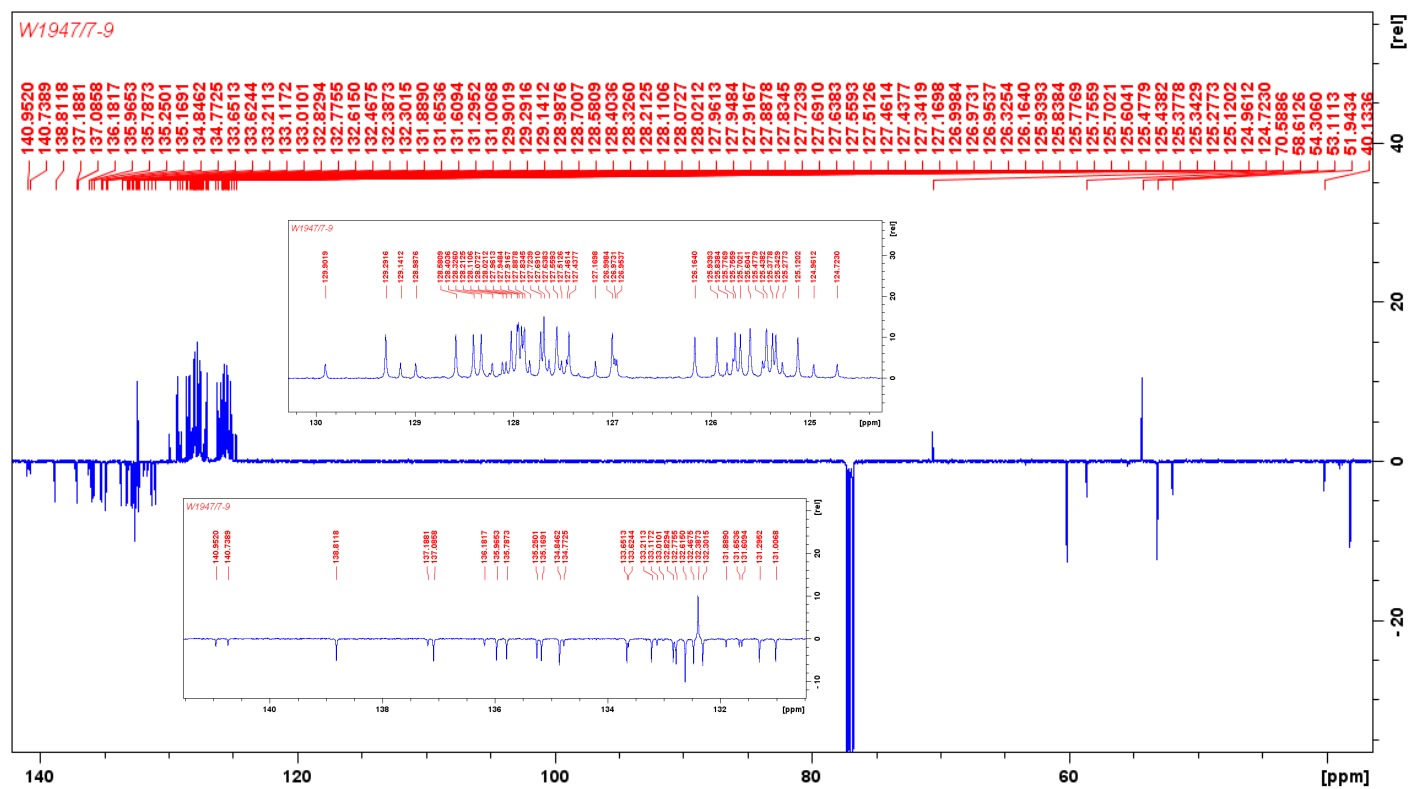Figure S11: mixture of 5 and 6 (70:30) (<sup>13</sup>C NMR in CDCl<sub>3</sub>)

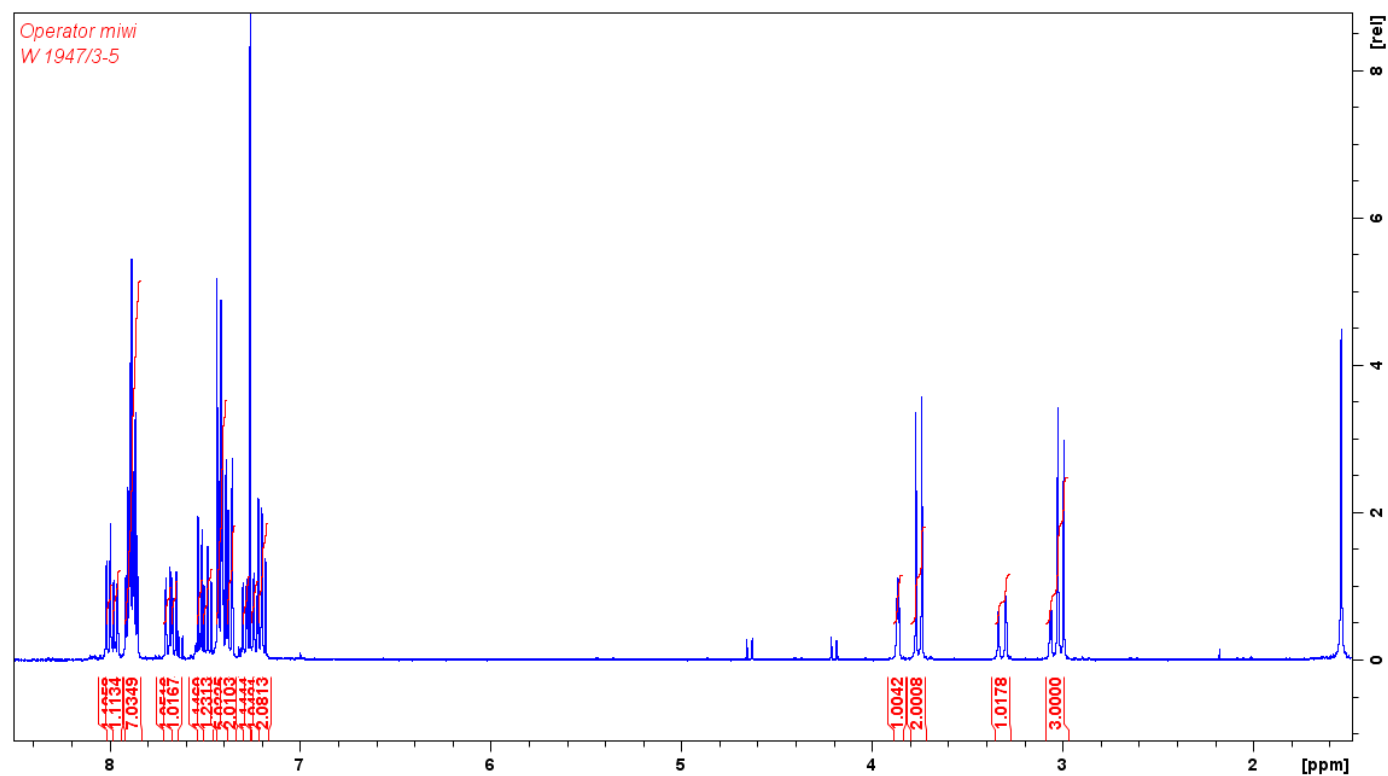



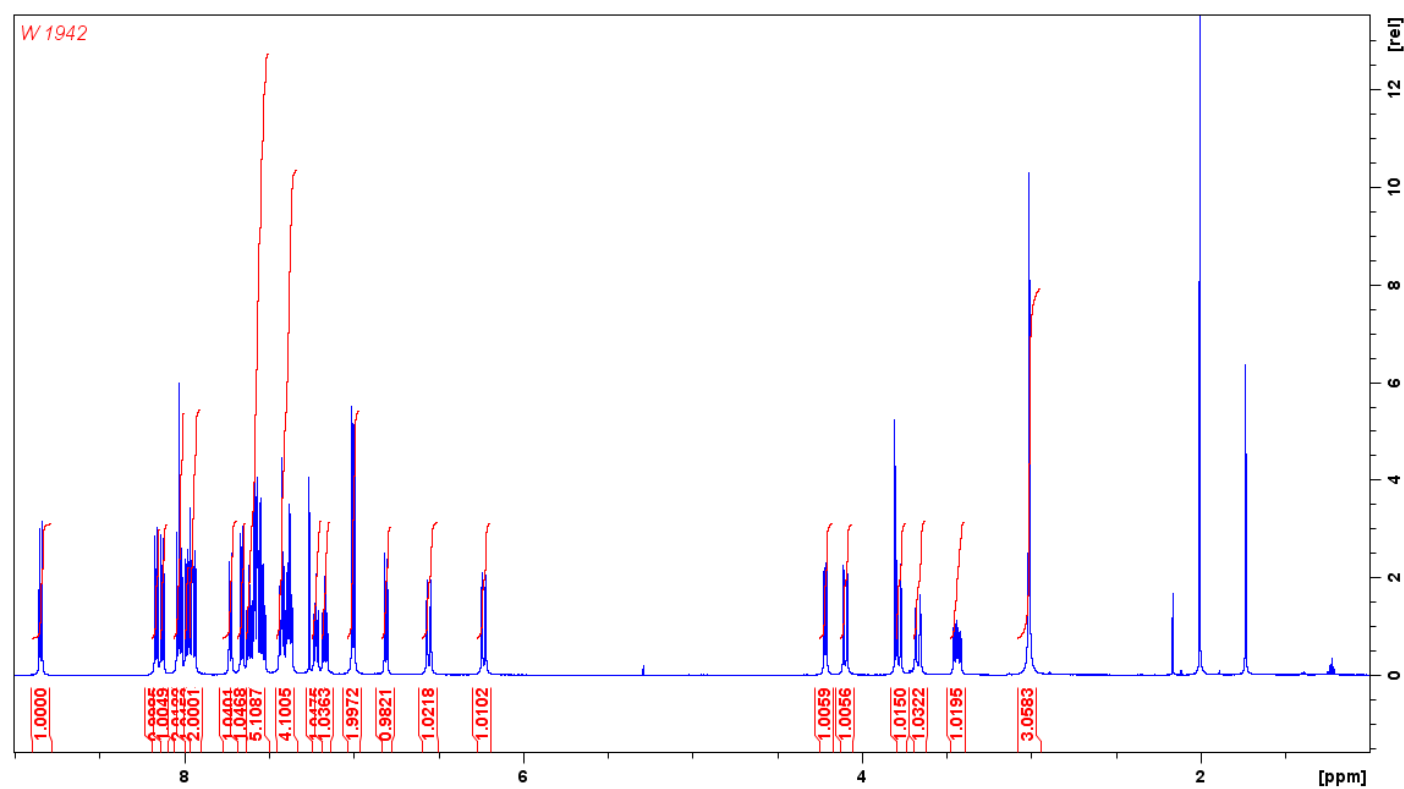

Figure S14: N-Methyl ammonium iodide of **4** (<sup>1</sup>H NMR in CDCl<sub>3</sub>)

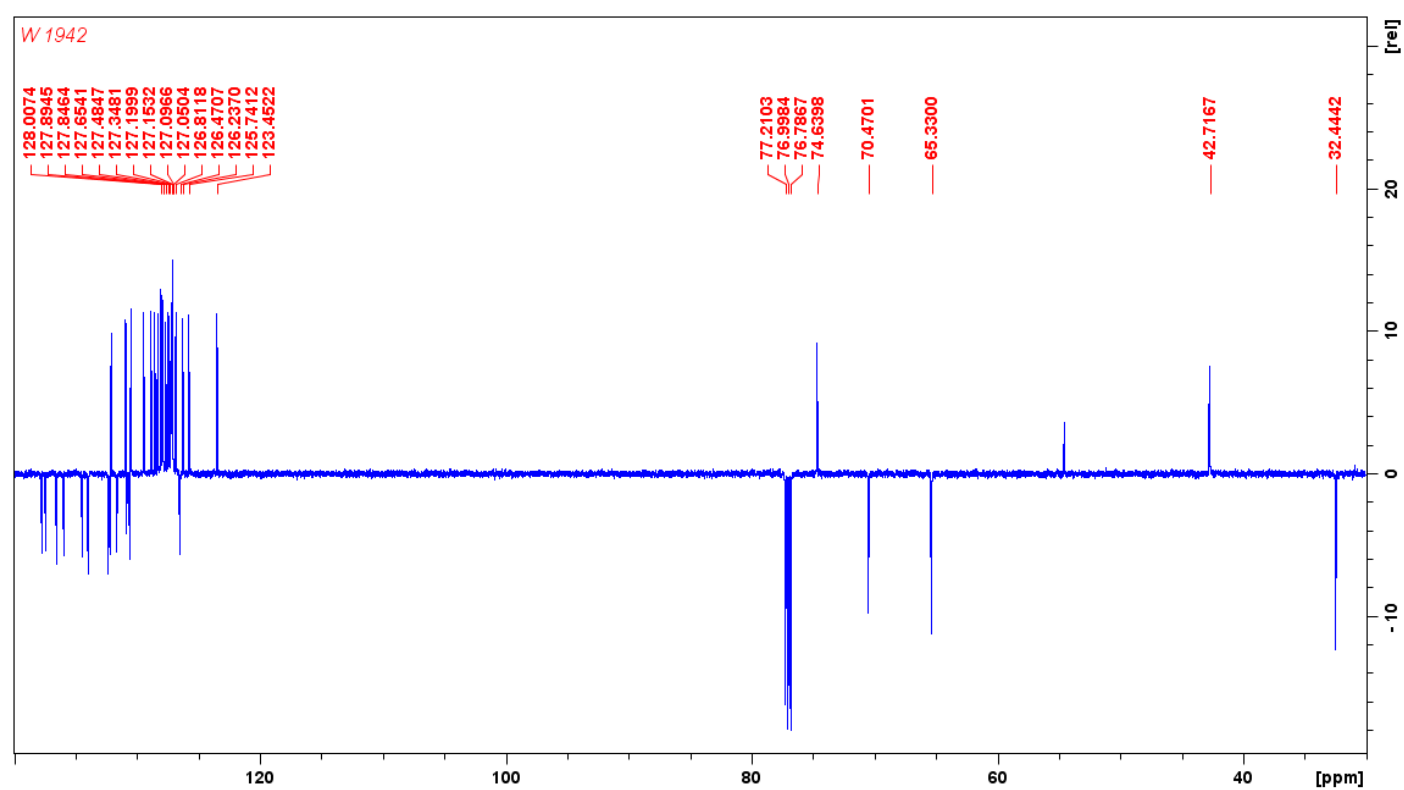

Figure S15: N-Methyl ammonium iodide of **4** (<sup>13</sup>C NMR in CDCl<sub>3</sub>)

**Table S1:** Experimental X-ray parameters and CCDC-Codes.

| Sample       | Machine | Source | Temp. | Detector Distance | Time/Frame | #Frames | Frame width | CCDC    |
|--------------|---------|--------|-------|-------------------|------------|---------|-------------|---------|
|              | Bruker  |        | [K]   | [mm]              | [s]        |         | [°]         |         |
| <b>Meso2</b> | D8      | Mo     | 100   | 40                | 11.2       | 1846    | 0.400       | 2069313 |
| <b>Rac2</b>  | D8      | Mo     | 100   | 30                | 20         | 2751    | 0.500       | 2069312 |
| <b>4</b>     | D8      | Mo     | 100   | 25                | 8          | 919     | 0.700       | 2069311 |

**Table S2:** Short C-C contacts in *rac-2*.

| Atom names | Distance [Å] |
|------------|--------------|
| C2A—C39A   | 3.339        |
| C3A—C39A   | 3.449        |
| C3A—C40A   | 3.552        |
| C4A—C40A   | 3.371        |
| C4A—C41A   | 3.468        |
| C4A—C34B   | 3.602        |
| C4A—C36B   | 3.558        |
| C5A—C40A   | 3.441        |
| C5A—C36B   | 3.471        |
| C6A—C36B   | 3.546        |
| C6A—C37B   | 3.567        |
| C36A—C4B   | 3.557        |
| C36A—C5B   | 3.529        |
| C36A—C6B   | 3.437        |
| C37A—C6B   | 3.329        |
| C37A—C7B   | 3.575        |
| C36B—C4B   | 3.558        |
| C36B—C5B   | 3.471        |
| C36B—C6B   | 3.546        |
| C39B—C2B   | 3.374        |
| C39B—C3B   | 3.547        |
| C40B—C3B   | 3.577        |
| C40B—C4B   | 3.456        |
| C40B—C5B   | 3.529        |
| C41B—C4B   | 3.491        |

**Table S3:** Hydrogen bridges.

|               | Distance [Å] |       | Angle [°]   |        |
|---------------|--------------|-------|-------------|--------|
| <i>meso-2</i> | H1—Br1       | 2.387 | O1—H1—Br2   | 165.66 |
|               | H2—Br2       | 2.403 | O2—H2—Br2   | 171.09 |
| <i>rac-2</i>  | H45—Br1      | 2.435 | C45—H45—Br1 | 175.02 |
|               | H46—Br1      | 2.479 | C46—H46—Br1 | 171.49 |
|               | H48—Br2      | 2.453 | C48—H48—Br2 | 167.84 |
|               | H49—Br2      | 2.506 | C49—H49—Br2 | 160.28 |
